# Supplementary material for: K2xSn4−xS8−x(x = 0.65–1): a new metal sulfide for rapid and selective removal of Cs+, Sr2+and UO22+ions
Source: Royal Society of Chemistry journal article supplement (doi:10.1039/c5sc03040d), 2015-10-27
Supplement: c5sc03040d1.pdf [file c5sc03040d1.pdf]

## SUPPORTING INFORMATION

### **$K_{2x}Sn_{4-x}S_{8-x}$ ( $x=0.65-1$ ): A New Metal Sulfide for Rapid and Selective Removal of $Cs^+$ , $Sr^{2+}$ and $UO_2^{2+}$ ions**

*Debajit Sarma<sup>†</sup>, Christos D. Malliakas<sup>†</sup>, K. S. Subrahmanyam<sup>†</sup>, Saiful M. Islam<sup>†</sup>, and Mercouri G. Kanatzidis<sup>\*,†,‡</sup>*

<sup>†</sup>Department of Chemistry, Northwestern University, 2145 Sheridan Road, Evanston, IL 60208, USA

<sup>‡</sup>Materials Science Division, Argonne National Laboratory, Argonne, IL 60439, USA

E-mail: [m-kanatzidis@northwestern.edu](mailto:m-kanatzidis@northwestern.edu)

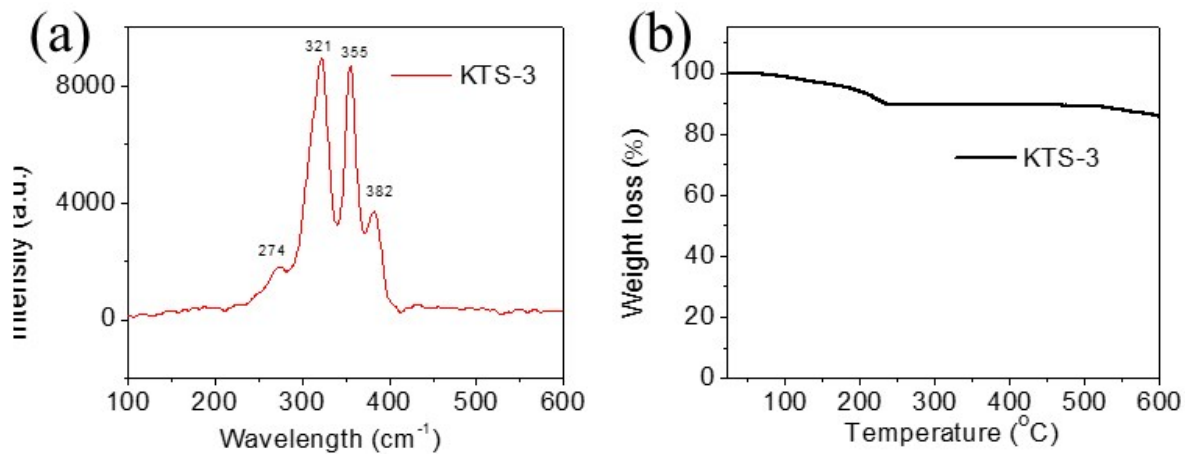

Figure S1. (a) Raman spectrum of KTS-3. The bands at 321, 355 are due to octahedral and the band at 382 cm<sup>-1</sup> is due to tetrahedral Sn-S bond vibrations and (b) thermogravimetric analysis of KTS-3 compound. Initial weight loss of ~10% up to 235°C corresponds to the loss of adsorbed water molecules.

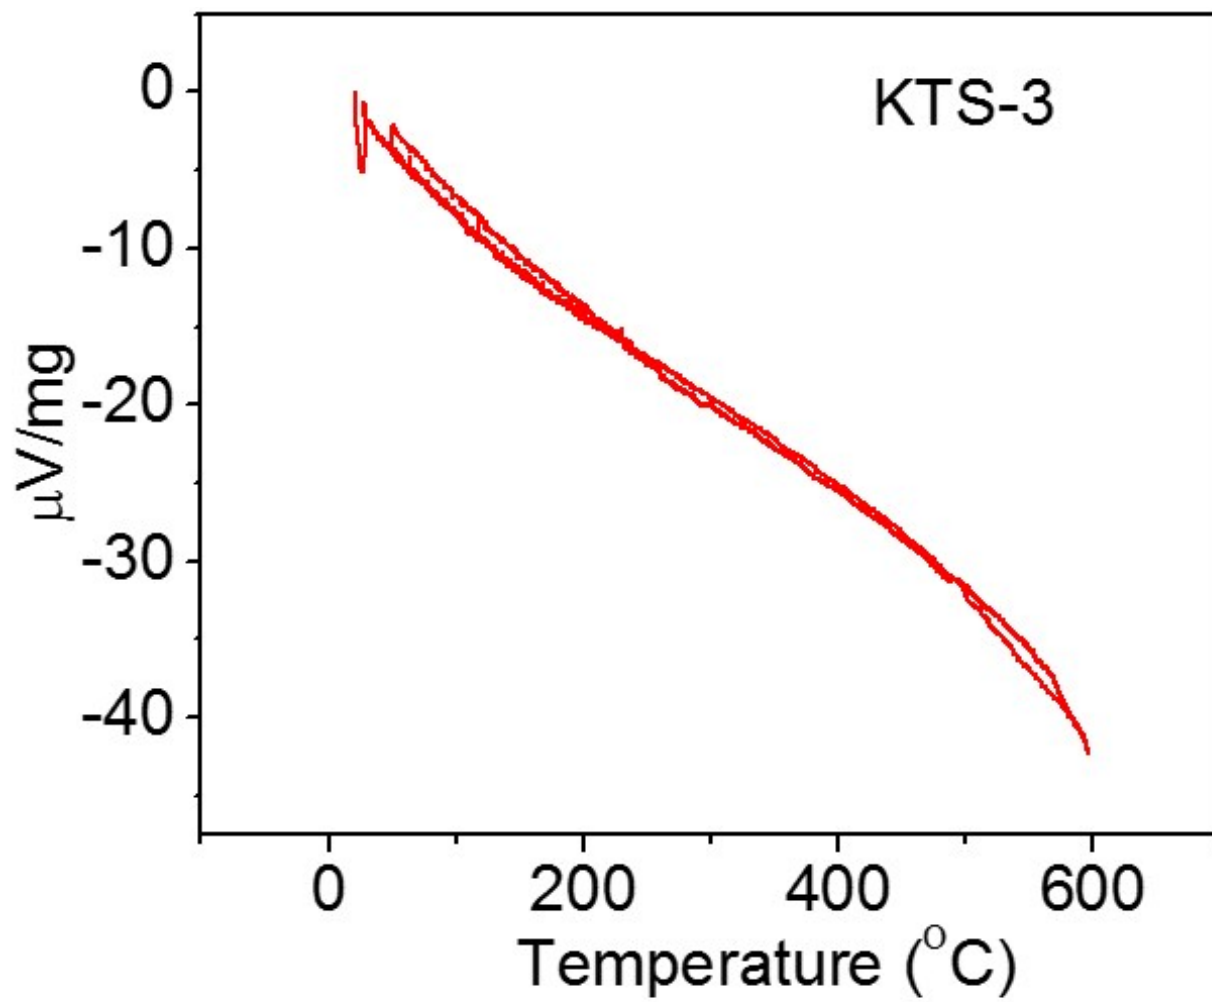

Figure S2. . Differential thermal analysis (DTA) of KTS-3 samples.

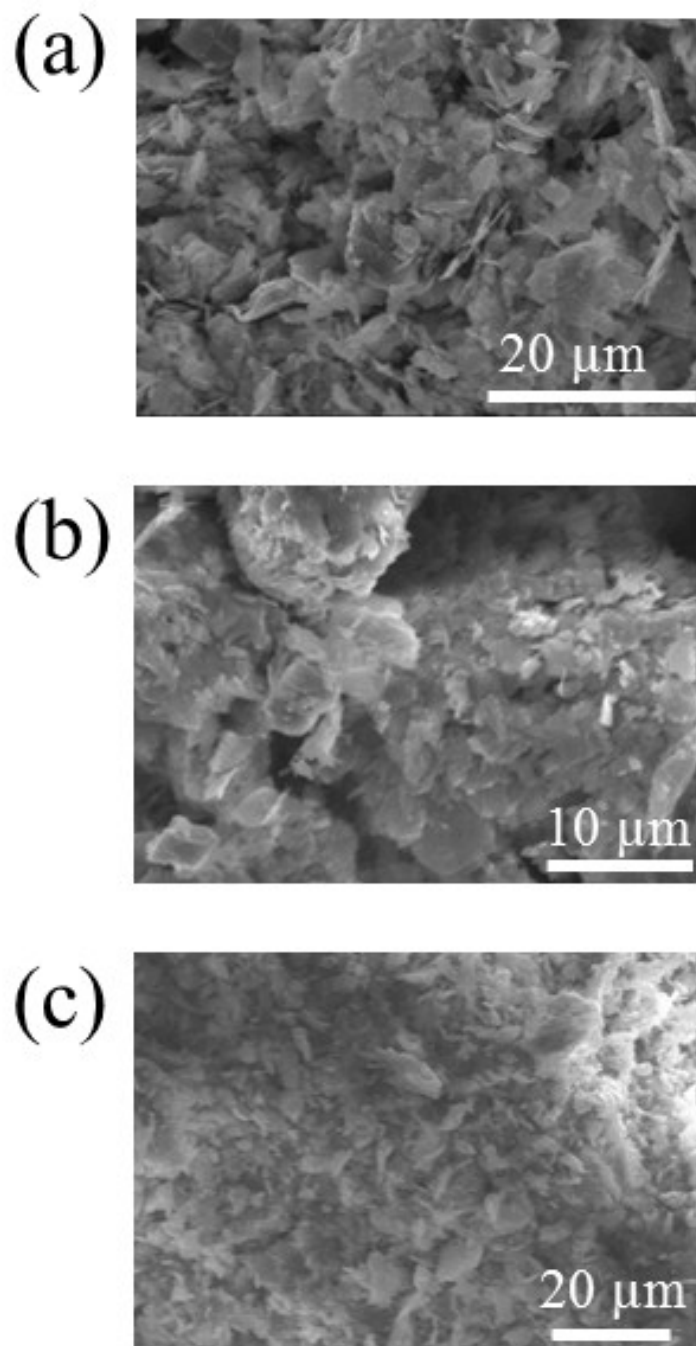

Figure S3. SEM image of the (a) Cs<sup>+</sup>, (b) Sr<sup>2+</sup>, and (c) UO<sub>2</sub><sup>2+</sup> exchanged polycrystalline K<sub>2x</sub>Sn<sub>4-x</sub>S<sub>8-x</sub> (x=0.65-1, KTS-3) materials.

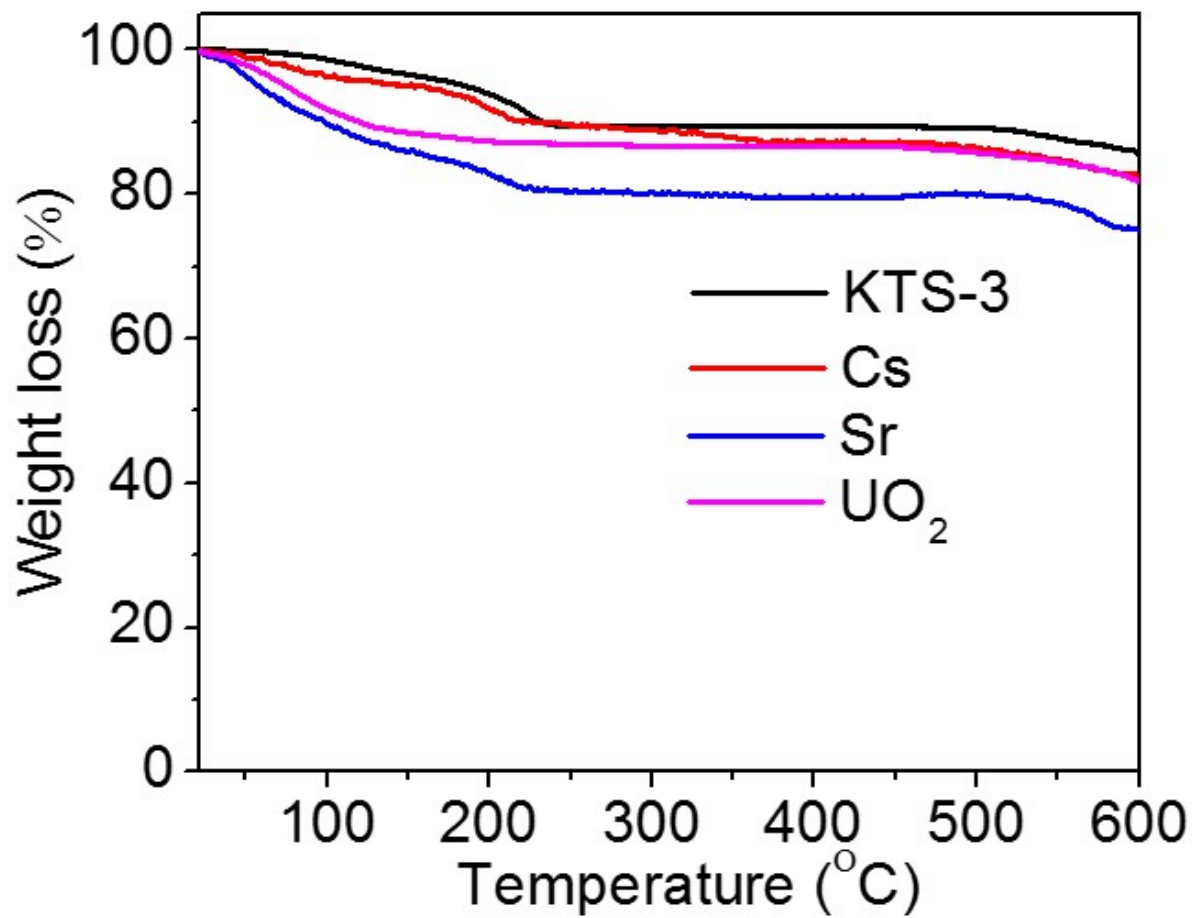

Figure S4. The TG analysis of the exchanged materials. Initial weight loss of ~10-20% up to 235°C corresponds to the loss of adsorbed water molecules. The degree of hydration for the exchanged materials follows the order  $\text{Sr}^{2+} > \text{UO}_2^{2+} > \text{Cs}^+ > \text{K}^+$ .

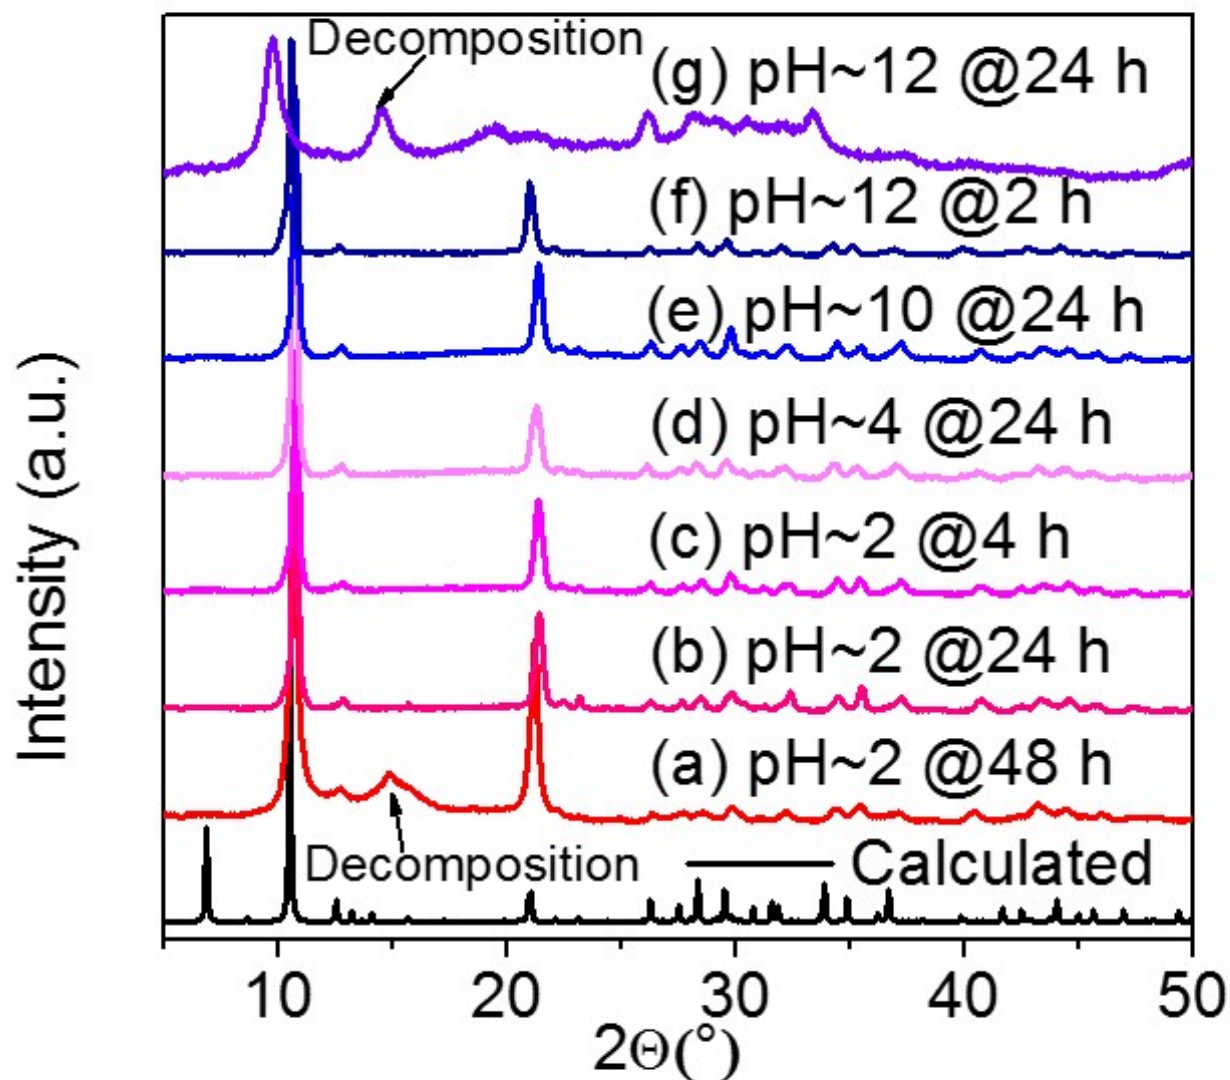

Figure S5. PXRD patterns of KTS-3 samples isolated at pH values of ~2, 4, 10, and 12.

Table 1: Fractional atomic coordinates and isotropic or equivalent isotropic displacement parameters ( $\text{\AA}^2$ ) for KTS-3- Subcell.

| Atom | $x$     | $y$          | $z$          | $U_{\text{iso}}^*/U_{\text{eq}}$ | Occupancy |
|------|---------|--------------|--------------|----------------------------------|-----------|
| Sn1  | 0.0000  | 0.18670 (3)  | 0.48613 (7)  | 0.0257 (4)                       | 1.0       |
| Sn2  | -0.5000 | 0.06612 (8)  | 0.51825 (15) | 0.0346 (6)                       | 0.5       |
| S1   | 0.0000  | 0.27693 (12) | 0.4206 (2)   | 0.0244 (7)                       | 1.0       |
| S2   | -0.5000 | 0.15494 (15) | 0.3979 (3)   | 0.0343 (9)                       | 1.0       |
| S3   | 0.0000  | 0.10403 (15) | 0.5675 (3)   | 0.0401 (10)                      | 1.0       |
| S4   | -0.5000 | 0.0163 (3)   | 0.4038 (8)   | 0.053 (3)                        | 0.5       |
| K1   | -0.5000 | 0.2438 (7)   | 0.2500       | 0.213 (11)                       | 1.0       |
| K2   | 0.0000  | 0.1628 (14)  | 0.7500       | 0.44 (3)                         | 1.0       |

Table 2: Atomic displacement parameters ( $\text{\AA}^2$ ) for KTS-3- Subcell.

| Atom | $U^{11}$    | $U^{22}$    | $U^{33}$    | $U^{12}$ | $U^{13}$ | $U^{23}$     |
|------|-------------|-------------|-------------|----------|----------|--------------|
| Sn1  | 0.0167 (6)  | 0.0185 (5)  | 0.0420 (7)  | 0.000    | 0.000    | -0.0010 (3)  |
| Sn2  | 0.0199 (10) | 0.0203 (9)  | 0.0636 (15) | 0.000    | 0.000    | -0.0082 (8)  |
| S1   | 0.0166 (15) | 0.0211 (14) | 0.0355 (16) | 0.000    | 0.000    | 0.0001 (13)  |
| S2   | 0.0188 (17) | 0.0375 (19) | 0.047 (2)   | 0.000    | 0.000    | -0.0129 (16) |
| S3   | 0.045 (2)   | 0.0240 (16) | 0.051 (2)   | 0.000    | 0.000    | 0.0072 (15)  |
| S4   | 0.036 (5)   | 0.027 (4)   | 0.095 (8)   | 0.000    | 0.000    | 0.024 (4)    |
| K1   | 0.40 (3)    | 0.175 (15)  | 0.067 (7)   | 0.000    | 0.000    | 0.000        |
| K2   | 0.83 (10)   | 0.38 (4)    | 0.104 (14)  | 0.000    | 0.000    | 0.000        |

Table 3: Selected bond lengths (Å) for KTS-3- Subcell.

|                       |            |
|-----------------------|------------|
| Sn1—S2                | 2.504 (3)  |
| Sn1—S2 <sup>i</sup>   | 2.504 (3)  |
| Sn1—S3                | 2.540 (4)  |
| Sn1—S1                | 2.583 (3)  |
| Sn1—S1 <sup>ii</sup>  | 2.596 (3)  |
| Sn1—S1 <sup>iii</sup> | 2.596 (3)  |
| Sn2—S3 <sup>iv</sup>  | 2.245 (3)  |
| Sn2—S3                | 2.245 (3)  |
| Sn2—S4                | 2.316 (13) |
| Sn2—S4 <sup>v</sup>   | 2.504 (9)  |

Table 4: Selected bond angles (°) for KTS-3- Subcell.

|                                         |             |
|-----------------------------------------|-------------|
| S2—Sn1—S2 <sup>i</sup>                  | 94.69 (14)  |
| S2—Sn1—S3                               | 92.44 (12)  |
| S2 <sup>i</sup> —Sn1—S3                 | 92.44 (12)  |
| S2—Sn1—S1                               | 92.52 (11)  |
| S2 <sup>i</sup> —Sn1—S1                 | 92.52 (11)  |
| S3—Sn1—S1                               | 172.67 (14) |
| S2—Sn1—S1 <sup>ii</sup>                 | 177.44 (9)  |
| S2 <sup>i</sup> —Sn1—S1 <sup>ii</sup>   | 87.45 (9)   |
| S3—Sn1—S1 <sup>ii</sup>                 | 88.87 (10)  |
| S1—Sn1—S1 <sup>ii</sup>                 | 85.97 (10)  |
| S2—Sn1—S1 <sup>iii</sup>                | 87.45 (9)   |
| S2 <sup>i</sup> —Sn1—S1 <sup>iii</sup>  | 177.44 (9)  |
| S3—Sn1—S1 <sup>iii</sup>                | 88.87 (10)  |
| S1—Sn1—S1 <sup>iii</sup>                | 85.97 (10)  |
| S1 <sup>ii</sup> —Sn1—S1 <sup>iii</sup> | 90.39 (11)  |
| S3 <sup>iv</sup> —Sn2—S3                | 110.2 (2)   |
| S3 <sup>iv</sup> —Sn2—S4                | 123.35 (12) |
| S3—Sn2—S4                               | 123.35 (12) |
| S3 <sup>iv</sup> —Sn2—S4 <sup>v</sup>   | 100.3 (2)   |
| S3—Sn2—S4 <sup>v</sup>                  | 100.3 (2)   |
| S4—Sn2—S4 <sup>v</sup>                  | 87.7 (4)    |

Symmetry codes: (i)  $x+1, y, z$ ; (ii)  $-x+1/2, -y+1/2, -z+1$ ; (iii)  $-x-1/2, -y+1/2, -z+1$ ; (iv)  $x-1, y, z$ ; (v)  $-x-1, -y, -z+1$ .



Table 4: Fractional atomic coordinates and isotropic or equivalent isotropic displacement parameters ( $\text{\AA}^2$ ) for KTS-3 - Supercell.

| Atom | $x$          | $y$         | $z$          | $U_{\text{iso}}^*/U_{\text{eq}}$ | Occupancy  |
|------|--------------|-------------|--------------|----------------------------------|------------|
| Sn1  | 0.12644 (7)  | 0.51425 (8) | 0.1577 (2)   | 0.0310 (3)                       | 1.0        |
| Sn2  | 0.12670 (7)  | 0.51351 (8) | 0.65342 (19) | 0.0300 (3)                       | 1.0        |
| Sn3  | 0.36902 (10) | 0.48174 (9) | -0.0319 (4)  | 0.0340 (4)                       | 0.730 (4)  |
| Sn4  | 0.3634 (3)   | 0.4812 (4)  | 0.4634 (13)  | 0.0734 (19)                      | 0.311 (5)  |
| S1   | -0.0543 (3)  | 0.5785 (2)  | 0.1033 (6)   | 0.0291 (7)                       | 1.0        |
| S2   | 0.2926 (4)   | 0.4315 (3)  | 0.2125 (8)   | 0.0382 (11)                      | 1.0        |
| S3   | 0.2930 (4)   | 0.4338 (4)  | 0.6886 (10)  | 0.0478 (14)                      | 1.0        |
| S4   | 0.1865 (3)   | 0.6046 (2)  | 0.4258 (8)   | 0.0338 (7)                       | 1.0        |
| S5   | 0.1950 (3)   | 0.5996 (2)  | -0.0756 (8)  | 0.0412 (9)                       | 1.0        |
| S6   | 0.0533 (2)   | 0.4205 (2)  | 0.3936 (6)   | 0.0278 (7)                       | 1.0        |
| S7   | 0.4706 (4)   | 0.5986 (4)  | -0.0193 (13) | 0.0473 (14)                      | 0.730 (4)  |
| S8   | 0.4534 (9)   | 0.5683 (9)  | 0.498 (3)    | 0.0473 (14)                      | 0.311 (5)  |
| K1A  | 0.0133 (9)   | 0.7525 (7)  | 0.412 (2)    | 0.101 (4)*                       | 0.673 (17) |
| K1B  | 0.1665 (17)  | 0.2491 (13) | 0.624 (3)    | 0.101 (4)*                       | 0.419 (16) |
| K3   | 0.331 (4)    | 0.747 (4)   | 0.662 (11)   | 0.45 (3)*                        | 0.82 (2)   |

Table 5: Atomic displacement parameters ( $\text{\AA}^2$ ) for KTS-3- Supercell.

| Atom | $U^{11}$    | $U^{22}$    | $U^{33}$    | $U^{12}$     | $U^{13}$     | $U^{23}$    |
|------|-------------|-------------|-------------|--------------|--------------|-------------|
| Sn1  | 0.0249 (5)  | 0.0472 (7)  | 0.0218 (6)  | -0.0019 (4)  | 0.0065 (9)   | 0.0000 (5)  |
| Sn2  | 0.0235 (5)  | 0.0449 (6)  | 0.0214 (5)  | 0.0002 (4)   | 0.0020 (9)   | 0.0026 (5)  |
| Sn3  | 0.0262 (5)  | 0.0532 (8)  | 0.0228 (6)  | -0.0094 (5)  | 0.0045 (9)   | 0.0125 (8)  |
| Sn4  | 0.031 (2)   | 0.133 (5)   | 0.062 (3)   | -0.003 (2)   | 0.028 (3)    | 0.002 (5)   |
| S1   | 0.0289 (15) | 0.0401 (18) | 0.0166 (14) | 0.0029 (12)  | -0.0031 (17) | 0.0123 (17) |
| S2   | 0.031 (2)   | 0.051 (3)   | 0.035 (2)   | 0.005 (2)    | 0.016 (2)    | 0.015 (2)   |
| S3   | 0.033 (2)   | 0.060 (4)   | 0.051 (3)   | 0.011 (2)    | 0.005 (3)    | 0.004 (3)   |
| S4   | 0.0328 (15) | 0.0453 (18) | 0.0218 (15) | -0.0070 (13) | -0.001 (2)   | 0.002 (2)   |
| S5   | 0.050 (2)   | 0.050 (2)   | 0.0230 (16) | -0.0175 (17) | 0.004 (3)    | 0.009 (2)   |
| S6   | 0.0215 (13) | 0.0415 (18) | 0.0198 (14) | -0.0032 (12) | 0.0004 (18)  | 0.0087 (18) |
| S7   | 0.034 (2)   | 0.065 (3)   | 0.040 (3)   | 0.009 (2)    | -0.007 (3)   | 0.015 (4)   |
| S8   | 0.034 (2)   | 0.065 (3)   | 0.040 (3)   | 0.009 (2)    | -0.007 (3)   | 0.015 (4)   |

Table 6: Selected bond lengths (Å) for KTS-3- Supercell.

|                      |           |                       |            |
|----------------------|-----------|-----------------------|------------|
| Sn1—S5               | 2.505 (5) | Sn2—S4                | 2.483 (5)  |
| Sn1—S4               | 2.533 (5) | Sn2—S5 <sup>ii</sup>  | 2.531 (6)  |
| Sn1—S1 <sup>i</sup>  | 2.556 (4) | Sn2—S3                | 2.542 (5)  |
| Sn1—S2               | 2.570 (5) | Sn2—S6                | 2.558 (4)  |
| Sn1—S1               | 2.583 (4) | Sn2—S6 <sup>iii</sup> | 2.586 (3)  |
| Sn1—S6               | 2.630 (4) | Sn2—S1 <sup>iii</sup> | 2.647 (4)  |
| Sn3—S3 <sup>iv</sup> | 2.305 (8) | Sn4—S8                | 1.879 (16) |
| Sn3—S2               | 2.341 (5) | Sn4—S2                | 2.122 (11) |
| Sn3—S7               | 2.374 (7) | Sn4—S3                | 2.163 (10) |
| Sn3—S7 <sup>v</sup>  | 2.483 (6) | Sn4—S8 <sup>vi</sup>  | 2.518 (13) |

Table 7: Selected bond angles (°) for KTS-3- Supercell.

|                                       |             |                                          |             |
|---------------------------------------|-------------|------------------------------------------|-------------|
| S5—Sn1—S4                             | 95.04 (14)  | S4—Sn2—S5 <sup>ii</sup>                  | 93.92 (13)  |
| S5—Sn1—S1 <sup>i</sup>                | 88.02 (15)  | S4—Sn2—S3                                | 92.84 (18)  |
| S4—Sn1—S1 <sup>i</sup>                | 176.02 (13) | S5 <sup>ii</sup> —Sn2—S3                 | 91.2 (2)    |
| S5—Sn1—S2                             | 92.51 (15)  | S4—Sn2—S6                                | 89.67 (14)  |
| S4—Sn1—S2                             | 92.40 (17)  | S5 <sup>ii</sup> —Sn2—S6                 | 176.41 (14) |
| S1 <sup>i</sup> —Sn1—S2               | 90.00 (16)  | S3—Sn2—S6                                | 88.72 (18)  |
| S5—Sn1—S1                             | 93.49 (14)  | S4—Sn2—S6 <sup>iii</sup>                 | 90.62 (13)  |
| S4—Sn1—S1                             | 92.59 (14)  | S5 <sup>ii</sup> —Sn2—S6 <sup>iii</sup>  | 94.14 (15)  |
| S1 <sup>i</sup> —Sn1—S1               | 84.68 (14)  | S3—Sn2—S6 <sup>iii</sup>                 | 173.42 (18) |
| S2—Sn1—S1                             | 171.83 (15) | S6—Sn2—S6 <sup>iii</sup>                 | 85.70 (14)  |
| S5—Sn1—S6                             | 177.93 (16) | S4—Sn2—S1 <sup>iii</sup>                 | 176.91 (13) |
| S4—Sn1—S6                             | 87.00 (14)  | S5 <sup>ii</sup> —Sn2—S1 <sup>iii</sup>  | 85.54 (14)  |
| S1 <sup>i</sup> —Sn1—S6               | 89.96 (12)  | S3—Sn2—S1 <sup>iii</sup>                 | 90.21 (18)  |
| S2—Sn1—S6                             | 87.00 (14)  | S6—Sn2—S1 <sup>iii</sup>                 | 90.87 (12)  |
| S1—Sn1—S6                             | 86.81 (12)  | S6 <sup>iii</sup> —Sn2—S1 <sup>iii</sup> | 86.39 (12)  |
| S3 <sup>iv</sup> —Sn3—S2              | 112.58 (16) | S8—Sn4—S2                                | 128.1 (8)   |
| S3 <sup>iv</sup> —Sn3—S7              | 119.7 (3)   | S8—Sn4—S3                                | 120.7 (8)   |
| S2—Sn3—S7                             | 124.7 (3)   | S2—Sn4—S3                                | 110.0 (3)   |
| S3 <sup>iv</sup> —Sn3—S7 <sup>v</sup> | 101.2 (3)   | S8—Sn4—S8 <sup>vi</sup>                  | 71.0 (7)    |
| S2—Sn3—S7 <sup>v</sup>                | 97.4 (2)    | S2—Sn4—S8 <sup>vi</sup>                  | 104.9 (6)   |
| S7—Sn3—S7 <sup>v</sup>                | 89.5 (2)    | S3—Sn4—S8 <sup>vi</sup>                  | 107.0 (6)   |

Symmetry codes: (i)  $-x, -y+1, -z$ ; (ii)  $x, y, z+1$ ; (iii)  $-x, -y+1, -z+1$ ; (iv)  $x, y, z-1$ ; (v)  $-x+1, -y+1, -z$ ; (vi)  $-x+1, -y+1, -z+1$ .
